# Supplementary material for: Growth differentiation factor 1-induced tumour plasticity provides a therapeutic window for immunotherapy in hepatocellular carcinoma
Source: PubMed Central journal article supplement (PMC8654996; doi:10.1038/s41467-021-27525-9), 2021-12-08
Supplement: 41467_2021_27525_MOESM1_ESM.pdf [file 41467_2021_27525_MOESM1_ESM.pdf]

## **Supplementary information**

# **Growth Differentiation Factor 1-Induced Tumour Plasticity Provides A Therapeutic Window for Immunotherapy in Hepatocellular Carcinoma**

### **List of contents**

Supplementary Fig.1: Expression of GDF1 in HCC tissues, cell lines and the *in vitro* functions

Supplementary Fig.2: The regulation of GDF1 on HCC lineage differentiation markers and their clinical association in HCC patients

Supplementary Fig.3: GDF1 activated through ALK7 for the oncogenic phenotypes

Supplementary Fig.4: GDF1 activated a broad panel of cancer testis antigens (CTAs) in HCC

Supplementary Fig.5: GDF1 suppressed the expression of epigenetic regulator LSD1

Supplementary Fig.6: The specified classifiers to divided HCC patients from the TCGA-LIHC project into 3 immunophenotypes

Supplementary Fig.7: GDF1-induced tumour lineage plasticity might sensitize HCC patients to anti-PD1 therapy

Supplementary Fig.8: Combination of LSD1 inhibitor and anti-PD1 antibody might provide novel therapeutic strategy for HCC patients

Supplementary Fig.9: QC metrics of RNA sequencing experiment performed in PLC-8024-CTR and PLC-8024-GDF1 cells

Supplementary Table 1: The association between GDF1 expression and clinical pathological features in TMA containing 196 HCC Patients

Supplementary Table 2: Univariate and multivariate Cox regression analysis of clinical pathological features associated with overall survival

Supplementary Table 3: Clinical characteristics of the patients in HKU cohort, TCGA cohort

Supplementary Table 4: Sequences of primers used in qPCR

Supplementary Table 5: Target sequences of shRNA and gRNA

## Supplementary Figures

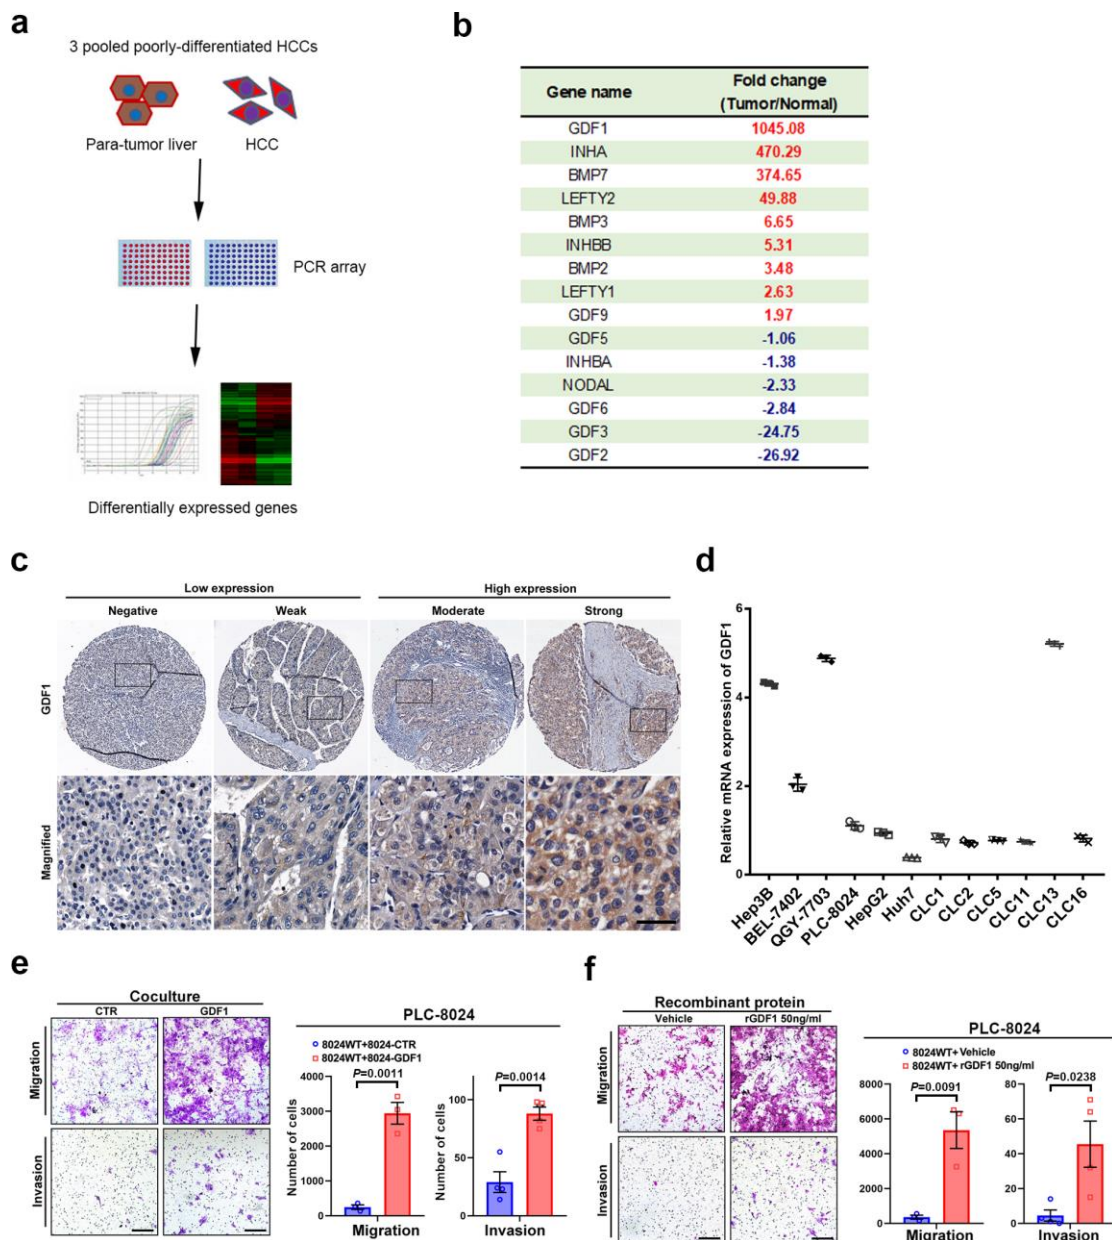

**Supplementary Fig.1: Expression of GDF1 in HCC tissues, cell lines and the *in vitro* functions**

**a** PCR array containing detection probes for genes encoding 375 secreting chemokines or cytokines, were performed in 3 pooled HCC tissues with poor differentiation and their paired non-tumour liver tissues. **b** The most differentially expressed genes were enriched in the TGF- $\beta$  superfamily members. **c** Representative images of GDF1 immunohistochemical staining at negative, low, moderate and high staining intensities in TMA containing 196 liver tumour tissues from HCC patients. Scale bar, 50 $\mu$ m, n= 3 independent experiments. **d** GDF1 expressions in 10 HCC cell lines were tested by qPCR (Data are presented as mean values  $\pm$  SD, data are the representative of three independent experiments). **e, f** Cell

migration and invasion abilities were detected in wildtype PLC-8024 cells cocultured with PLC-8024-GDF1 cells (e), or addition of recombinant GDF1 protein (f) at concentration of 50 ng/mL (Two-tailed independent Student's *t* test, data are presented as mean values ± SEM, n=3-4 independent experiments). Source data are provided as a Source Data file.

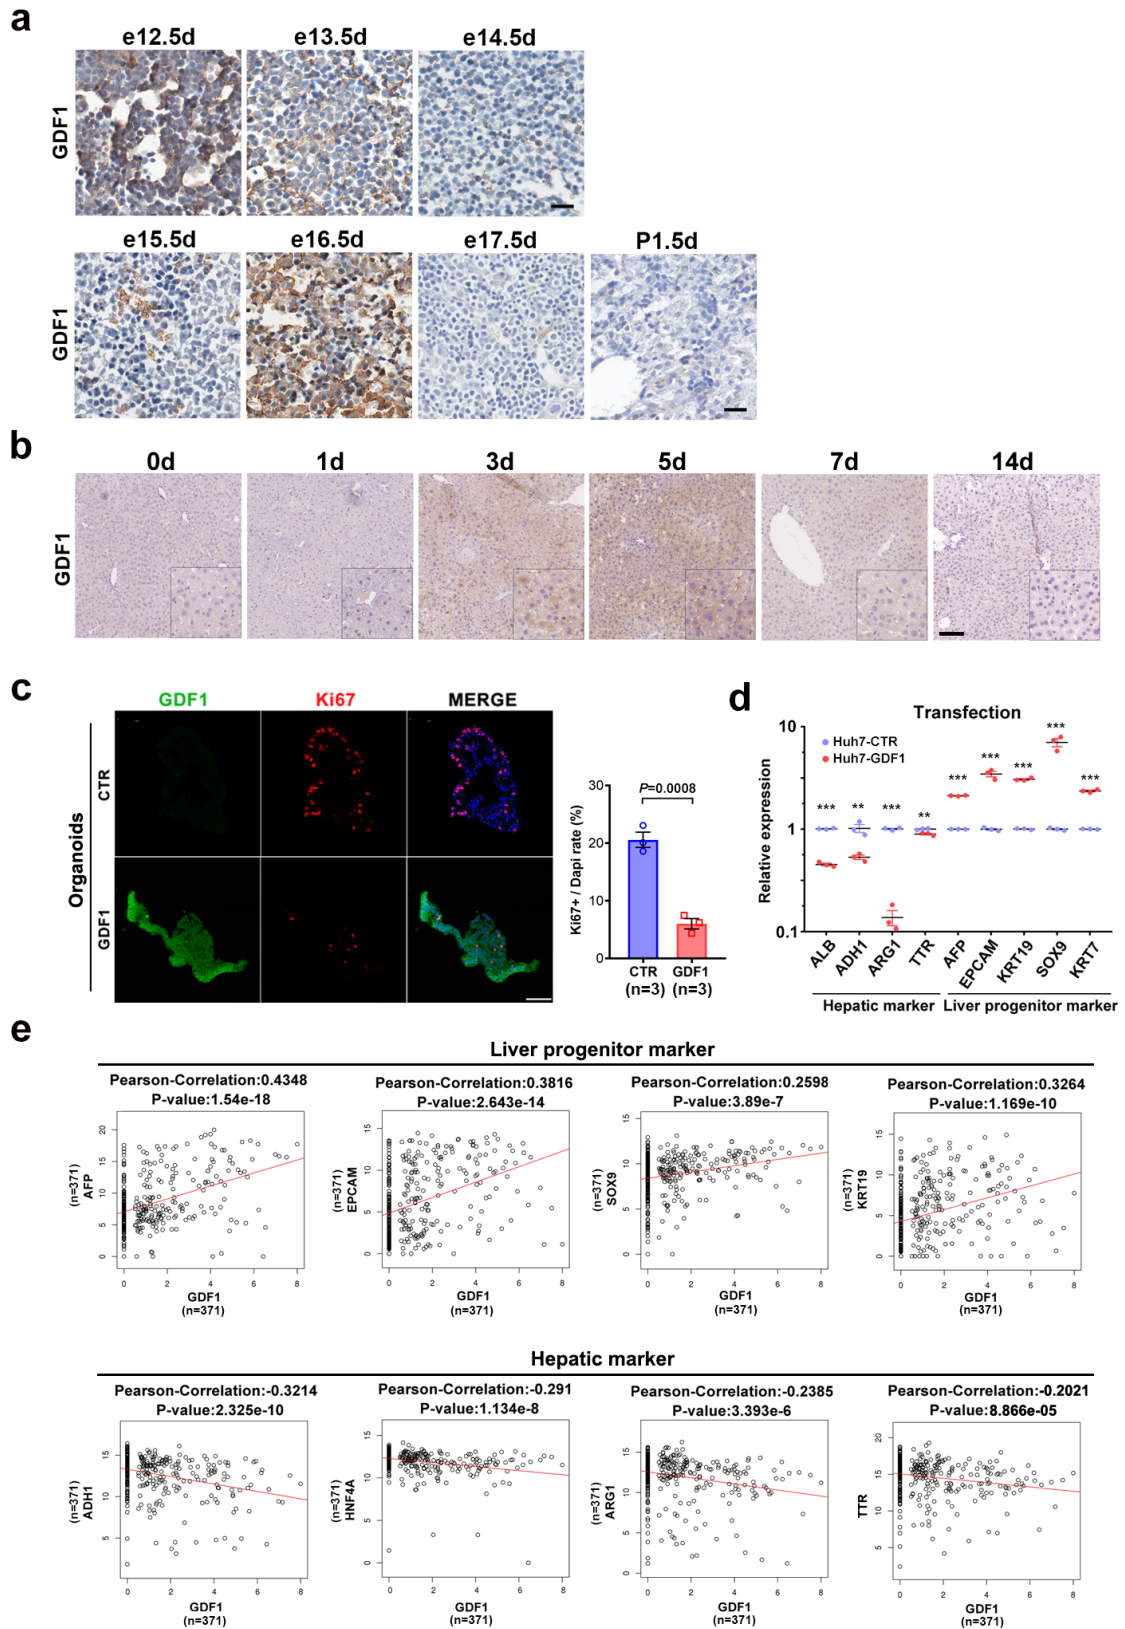

Supplementary Fig.2: The regulation of GDF1 on HCC lineage differentiation markers and their clinical association in HCC patients

**a** IHC staining of GDF1 in fetal mice liver. Scale bar, 20 $\mu$ m, n= 3 independent experiments. **b** IHC staining of GDF1 in regenerating mice liver after partial hepatectomy. Scale bar, 100 $\mu$ m, n= 3 independent experiments. **c** Immunofluorescent costaining of GDF1 with Ki67 in primary mice hepatocytes, which were cultured in an organoid model, and subjected to lenti-virus-mediated transfection of GDF1 or control vector. Scale bar, 50 $\mu$ m. (Two-tailed independent Student's *t* test, data are presented as mean values  $\pm$  SEM, n= 3 independent experiments). **d** Representative hepatic markers (ALB, ARG1, TTR, HNF4A) and liver progenitor markers (AFP, EPCAM, KRT19, SOX9, KRT7) were examined by qPCR in Huh7 cells stably transfected with or without GDF1 (\*\*,  $P < 0.01$ , \*\*\*,  $P < 0.001$ , two-tailed independent Student's *t* test, data are presented as mean values  $\pm$  SD, data are the representative of three independent experiments). **e** Correlation analyses between the expressions of GDF1, liver progenitor markers and hepatic markers in HCC by using Linkedomics web server based on the TCGA database (n=371). Source data are provided as a Source Data file.

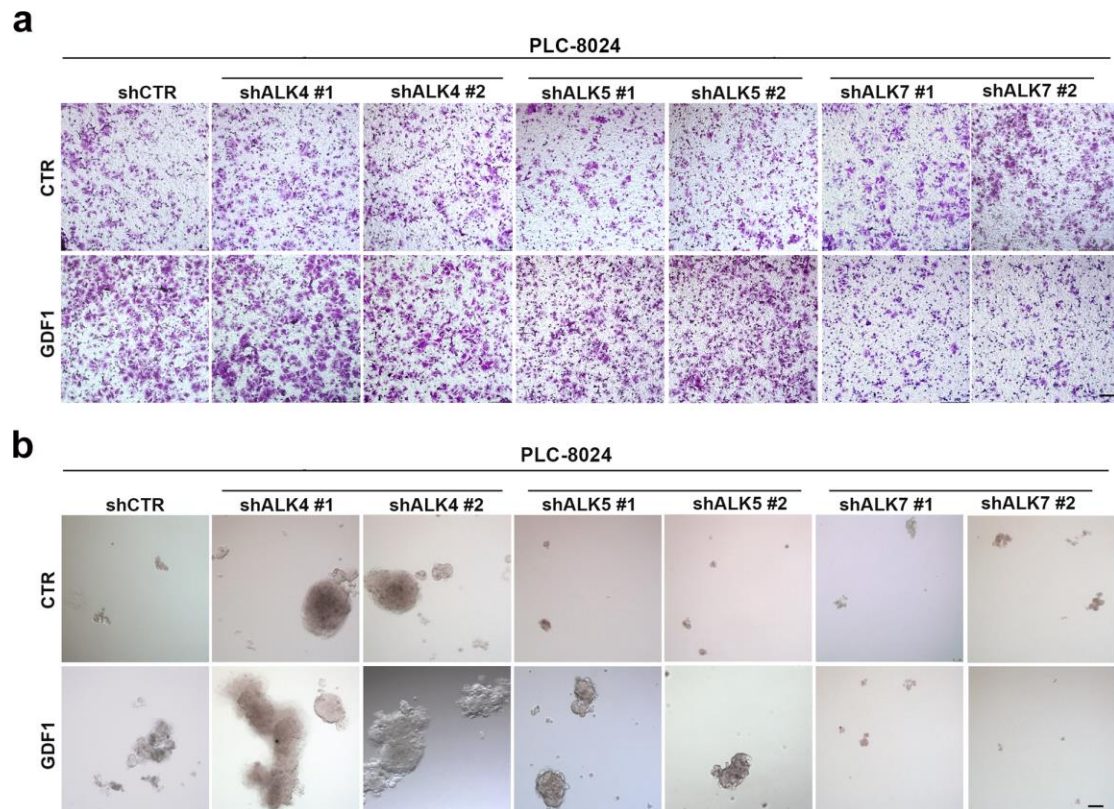

**Supplementary Fig.3: GDF1 activated through ALK7 for the oncogenic phenotypes**

**a** PLC-8024 cells transfected with or without GDF1 were transduced with lentivirus-mediated shRNAs specifically targeting different ALK4, ALK5, ALK7, respectively. Cell migration assays were performed in different targeting groups. Scale bars represent 100  $\mu$ m. **b** Sphere formation assays were performed in different targeting groups. Scale bars represent 100  $\mu$ m. All data are the representative of three independent experiments.



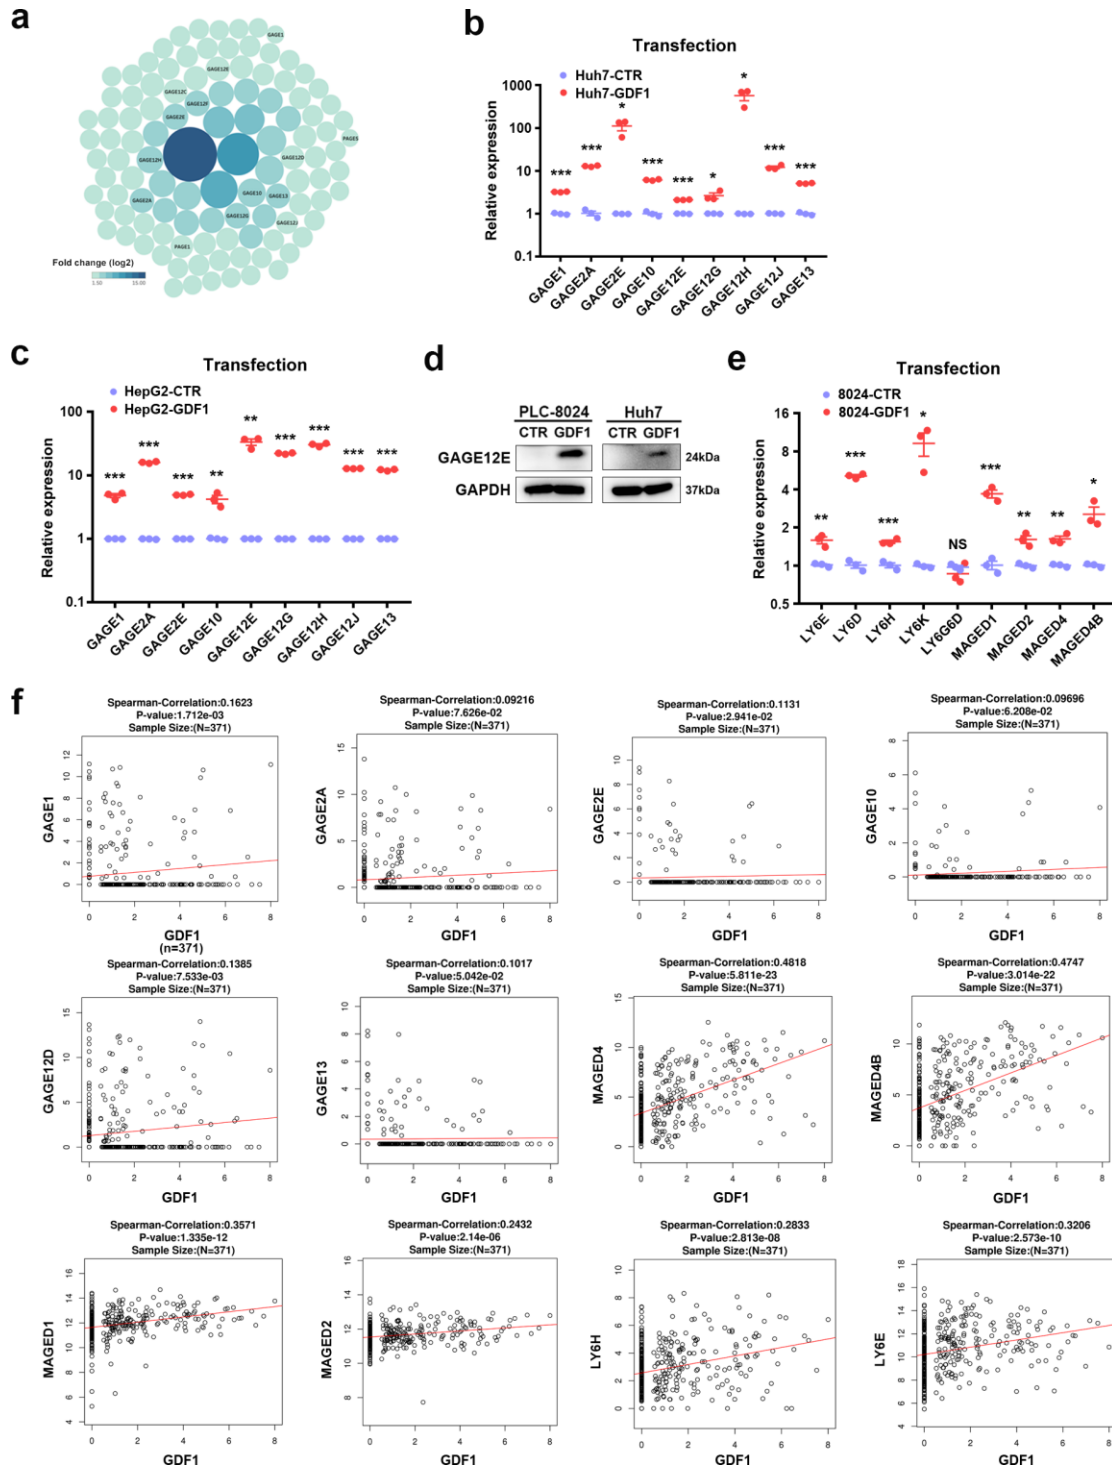

**Supplementary Fig.4: GDF1 activated a broad panel of cancer testis antigens (CTAs) in HCC**

**a** RNA-seq was performed in PLC-8024-CTR and PLC-8024-GDF1 cells. Bubble chart indicated that the most differentially expressed genes were enriched in CTAs including GAGE family members. **b** The relative expression of representative CTAs was detected by qPCR in Huh7-CTR and Huh7-GDF1 cells (\*,  $P < 0.05$ , \*\*\*,  $P < 0.001$ , two-tailed independent Student's  $t$  test, data are presented as mean values  $\pm$  SD, data are the representative of three independent experiments). **c** The relative expression of



representative CTAs was detected by qPCR in HepG2-CTR and HepG2-GDF1 cells (\*\*,  $P < 0.01$ , \*\*\*,  $P < 0.001$ , two-tailed independent Student's  $t$  test, data are presented as mean values  $\pm$  SD, data are the representative of three independent experiments). **d** The expression of GAGE12E at the protein level was detected by Western Blot in PLC-8024 and Huh7 cells transfected with or without GDF1 (Data are the representative of three independent experiments). **e** The relative expression of other CTAs including MAGE and LY6 family members was detected by qPCR in PLC-8024-CTR and PLC-8024-GDF1 cells (\*,  $P < 0.05$ , \*\*,  $P < 0.01$ , \*\*\*,  $P < 0.001$ , NS, not significant, two-tailed independent Student's  $t$  test, data are presented as mean values  $\pm$  SD, data are the representative of three independent experiments). **f** Correlation analyses between the expressions of GDF1, GAGE family members, MAGE and LY6 family members in HCC by using Linkedomics web server based on the TCGA database (n=371). Source data are provided as a Source Data file.

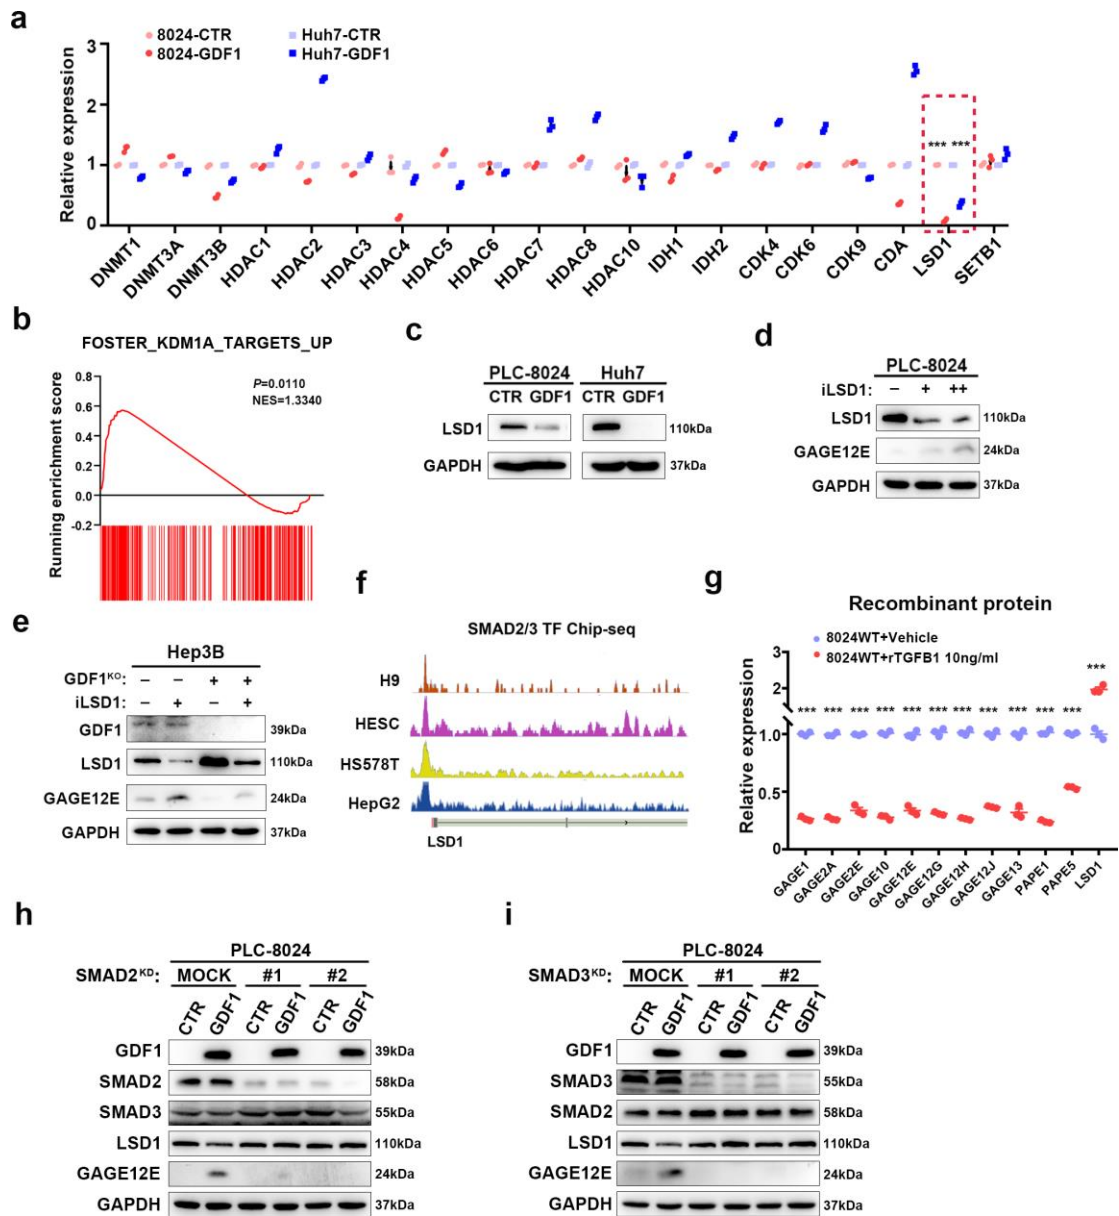

### Supplementary Fig.5: GDF1 suppressed the expression of epigenetic regulator LSD1

**a** The relative expression of a panel of epigenetic modulators was detected by qPCR in PLC-8024 and Huh7 cells transfected with or without GDF1 (\*\*\*,  $P < 0.001$ , two-tailed independent Student's  $t$  test, data are presented as mean values  $\pm$  SD, data are the representative of three independent experiments). **b** GSEA of LSD1 target genes signature in PLC-8024-GDF1 cells versus control cells. NES, normalized enrichment score. **c** The expression of LSD1 at the protein level was detected by Western Blot in PLC-8024 and Huh7 cells transfected with or without GDF1 (Data are the representative of three independent experiments). **d** PLC-8024 cells were treated with LSD1 inhibitor at 5  $\mu$ M or 10  $\mu$ M for 72 hours. The expression of GAGE12E and LSD1 at the protein level was examined by western blot. iLSD1, GSK-LSD1. +, 5  $\mu$ M. ++, 10  $\mu$ M (Data are the representative of three independent experiments). **e** Hep3B-

CTR and Hep3B GDF1<sup>KO</sup> cells were treated with LSD1 inhibitor at 5  $\mu$ M or 10  $\mu$ M for 72 hours. The expression of GAGE12E and LSD1 at the protein level was examined by western blot. **i** LSD1, GSK-LSD1. +, 5  $\mu$ M. ++, 10  $\mu$ M (Data are the representative of three independent experiments). **f** Data from the Encyclopedia of DNA Elements database indicated the occupation of SMAD2/3 on the promoter region of LSD1 in several cell lines. **g** The relative expression of representative CTAs was detected by qPCR in PLC-8024 cells treated with rTGFB1 at 10 ng/mL or vehicle control for 15 days (\*\*\*,  $P < 0.001$ , two-tailed independent Student's *t* test, data are presented as mean values  $\pm$  SD, data are the representative of three independent experiments). **h, i** The expression of LSD1 and GAGE12E at the protein level was detected by Western Blot in PLC-8024-CTR and PLC-8024-GDF1 cells transduced with lentivirus-mediated shRNAs specifically targeting SMAD2 (**h**) or SMAD3 (**i**) (Data are the representative of three independent experiments). Source data are provided as a Source Data file.

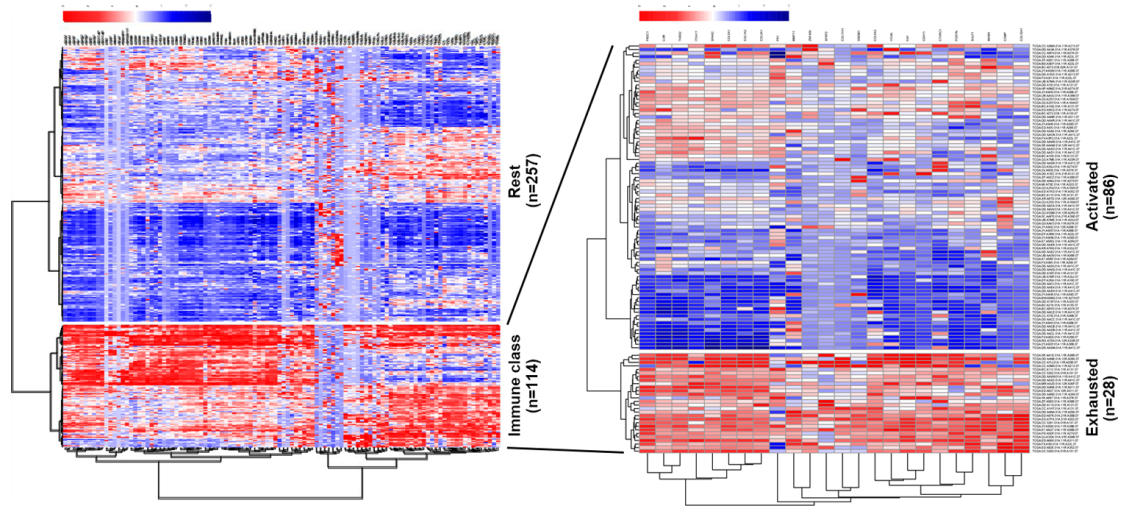

**Supplementary Fig.6: The specified classifiers to divided HCC patients from the TCGA-LIHC project into 3 immunophenotypes**

HCC patients from the TCGA-LIHC project were divided into 3 subgroups (the activated immune group, exhausted immune group, and remaining group) according to the specified classifiers.

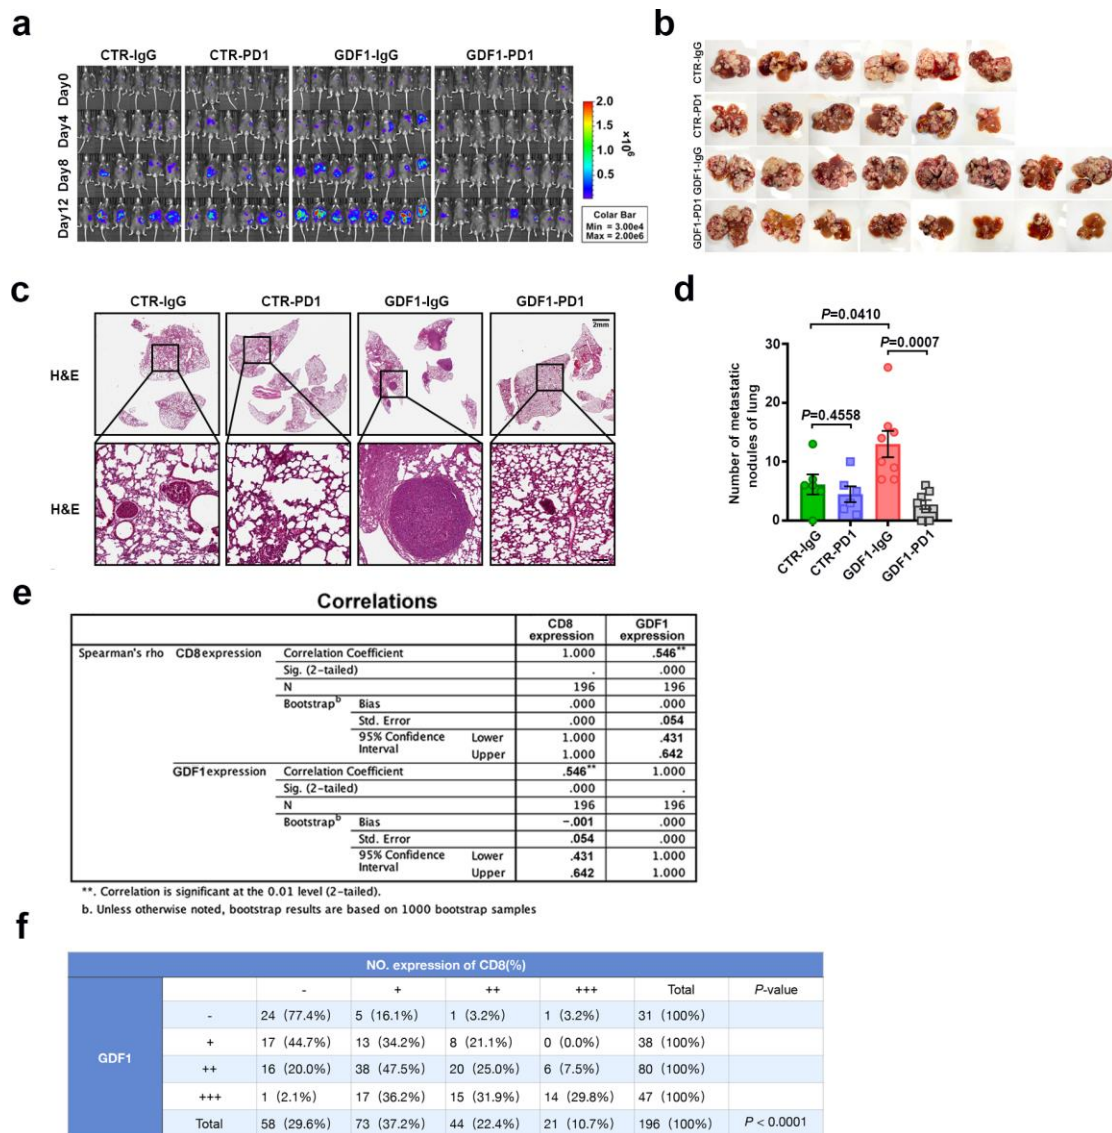

### Supplementary Fig.7: GDF1-induced tumour lineage plasticity might sensitize HCC patients to anti-PD1 therapy

**a** Representative bioluminescence images of mice bearing orthotopic Hepa1-6 tumours after anti-PD1 antibody or rat IgG2a control therapy. **b** Representative photographs of liver tumours after anti-PD1 antibody or rat IgG2a control treatment. **c** HE staining of representative metastatic lung nodules after anti-PD1 antibody or rat IgG2a control treatment. Scale bar, 200 $\mu$ m. **d** The number of metastatic lung nodules in mice bearing Hepa1-6 tumours transfected with mGDF1 after anti-PD1 antibody or rat IgG2a control therapy (Two-tailed independent Student's *t* test, data are presented as mean values  $\pm$  SEM, CTR-IgG: n = 6, CTR-PD1: n = 6, GDF1-IgG: n = 8, GDF1-PD1: n = 8). **e** Spearmen correlation analyses (Two-tailed) was used for GDF1 and CD8 expression in HCC patients from the TMA. **f** Crosstab of

GDF1 and CD8 consecutive staining in HCC patients from the TMA.  $P < 0.0001$ , Two-sided  $\chi^2$  test.

Source data are provided as a Source Data file.



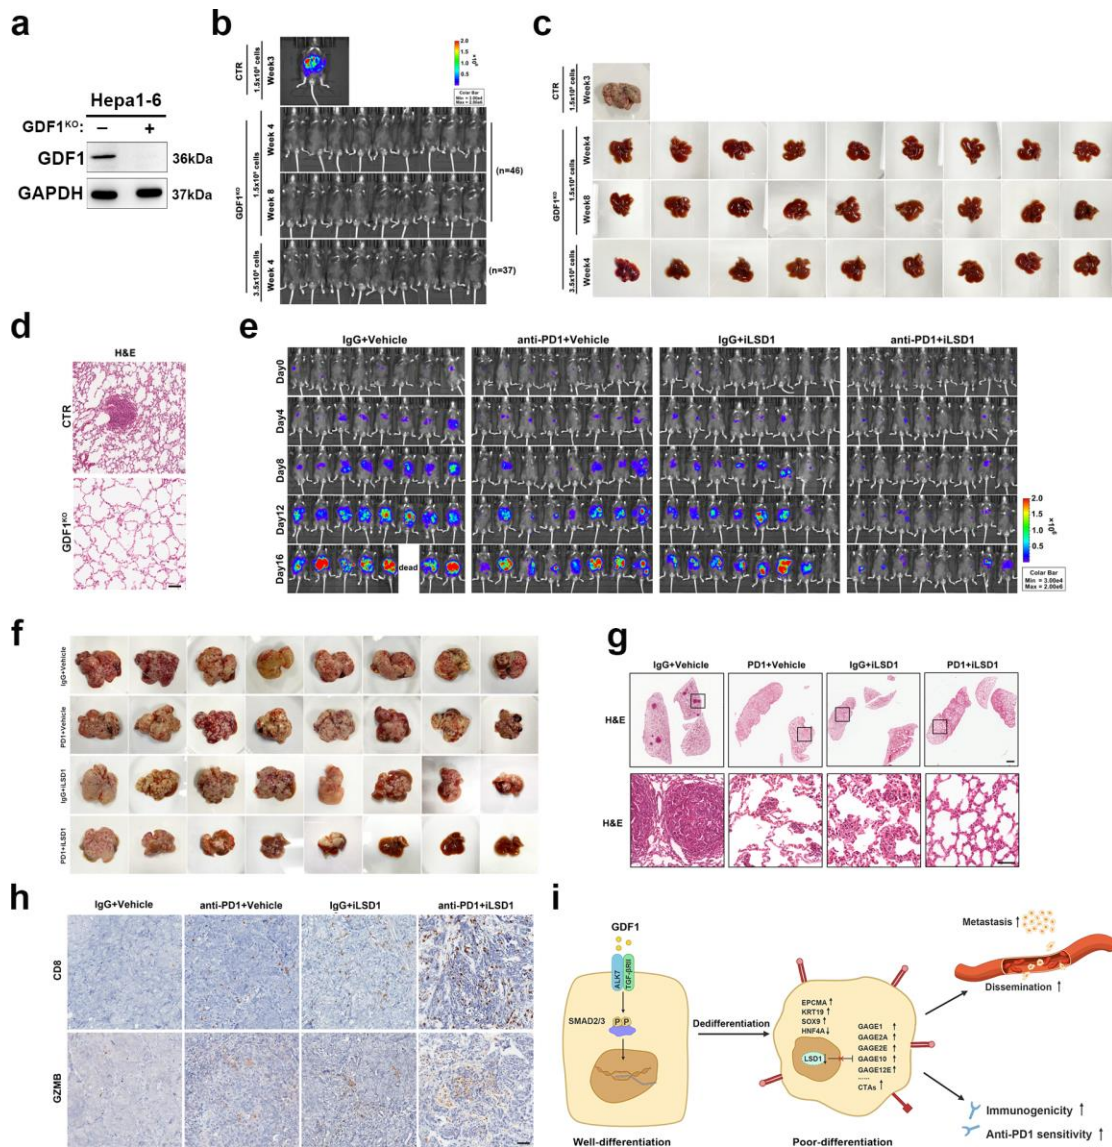

**Supplementary Fig.8: Combination of LSD1 inhibitor and anti-PD1 antibody might provide novel therapeutic strategy for HCC patients**

**a** The expression of GDF1 at the protein level was detected by Western Blot in Hepa1-6 CTR or Hepa1-6 GDF1<sup>KO</sup> cells (Data are the representative of three independent experiments). **b** To establish a luciferase-labelled metastatic HCC model, different number of Hepa1-6-CTR or Hepa1-6-GDF1<sup>KO</sup> cells stably expressing firefly luciferase were intrasplenically injected into C57BL/6 mice. Representative bioluminescence images of mice bearing metastatic Hepa1-6 CTR or Hepa1-6 GDF1<sup>KO</sup> tumours on different days post tumour inoculation. Top panel: Hepa1-6 CTR, 1.5×10<sup>6</sup> cells/mouse, 3 weeks later; Middle panel: Hepa1-6-GDF1<sup>KO</sup>, 1.5×10<sup>6</sup> cells/mouse, 4 weeks and 8weeks later (n=46); Bottom panel: Hepa1-6-GDF1<sup>KO</sup>, 3.5×10<sup>6</sup> cells/mouse, 4 weeks later (n=37). **c** Representative photographs of liver tumours after inoculating different number of Hepa1-6-CTR or Hepa1-6-GDF1<sup>KO</sup> cells. Top panel:



Hepa1-6 CTR,  $1.5 \times 10^6$  cells/mouse, 3 weeks later; Middle panel: Hepa1-6-GDF1<sup>KO</sup>,  $1.5 \times 10^6$  cells/mouse, 4 weeks and 8 weeks later (n = 46, 10 mice were euthanized to collect tumours at 4 weeks, while the rest continued to evaluate tumour formation and metastasis until 8 weeks post tumour inoculation); Bottom panel: Hepa1-6-GDF1<sup>KO</sup>,  $3.5 \times 10^6$  cells/mouse, 4 Weeks post tumour inoculation (n = 37). **d** HE staining were performed in metastatic lung tumour nodules (Data are the representative of ten independent experiments). **e** Representative bioluminescence images of mice bearing metastatic Hepa1-6-CTR tumours after combination treatment of LSD1 inhibitor with anti-PD1 antibody. **f** Representative photographs of liver tumours after combination treatment of LSD1 inhibitor with anti-PD1 antibody. **g** HE staining of representative metastatic lung nodules after combination treatment of LSD1 inhibitor with anti-PD1 antibody (n= 8 mice per group). **h** IHC staining of CD8 and GZMB in mouse orthotopic Hepa1-6-CTR tumours after combination treatment of LSD1 inhibitor with anti-PD1 antibody. Scale bars represent 50  $\mu$ m, n= 5 independent experiments. **i** Schematic figure summarizing the functions of GDF1 in HCC. Source data are provided as a Source Data file.

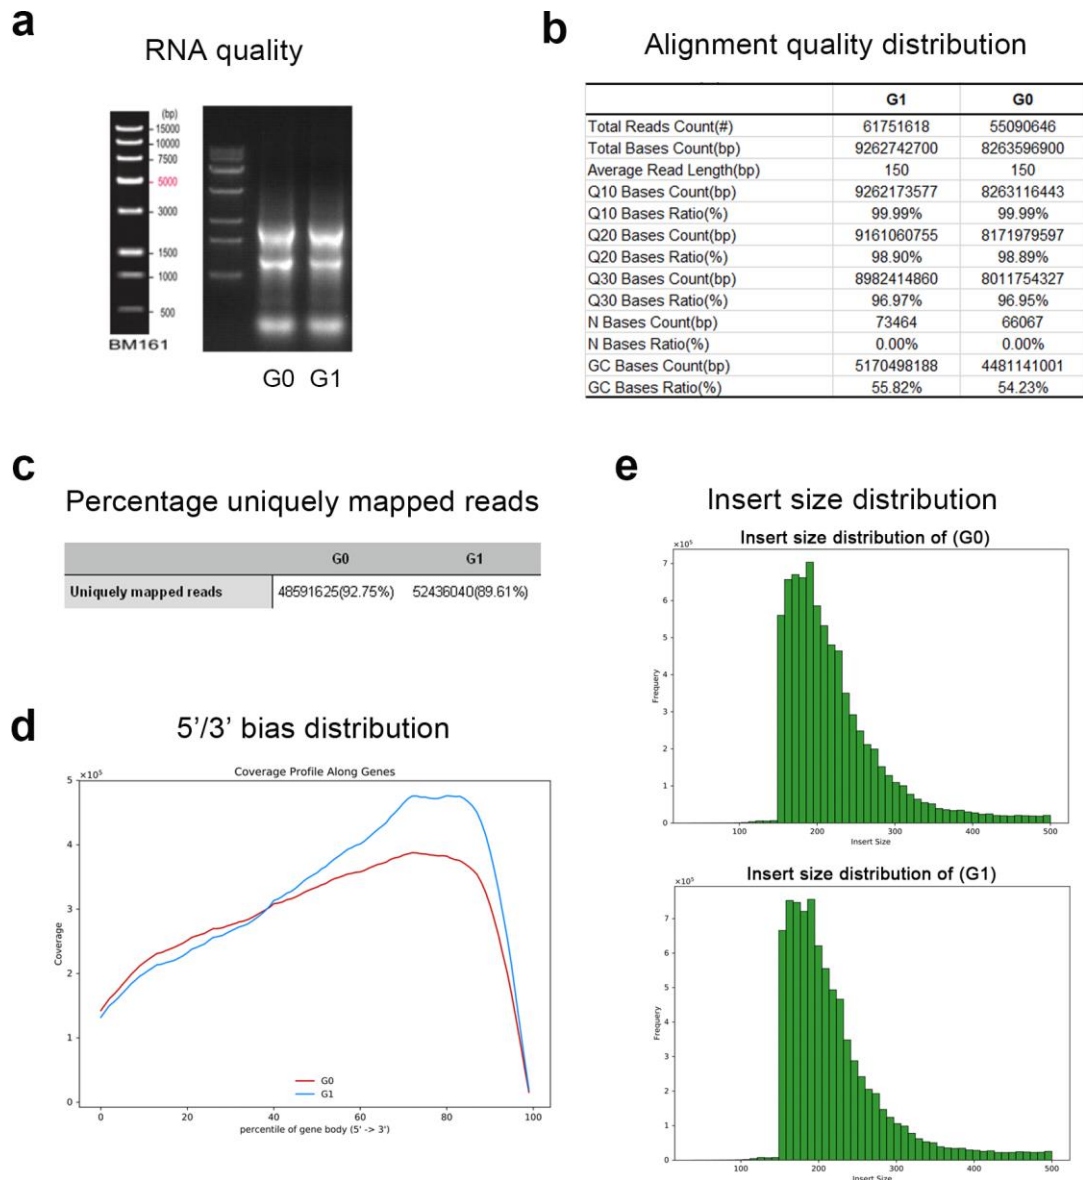

**Supplementary Fig.9: QC metrics of RNA sequencing experiment performed in PLC-8024-CTR and PLC-8024-GDF1 cells**

**a** Agarose gel electrophoresis of RNA used in RNA sequencing experiment. **b** Alignment quality distribution of RNA sequencing experiment. **c** Percentage uniquely mapped reads of RNA sequencing experiment. **d** 5'/3' bias distribution of RNA sequencing experiment. **e** Insert size distribution of RNA sequencing experiment. G0, PLC-8024-CTR. G1, PLC-8024-GDF1.

**Supplementary Table 1** The association between GDF1 expression and clinical pathological features in TMA containing 196 HCC Patients.

| Clinical pathological features | Total | GDF1 expression |      | <i>P</i> *   |
|--------------------------------|-------|-----------------|------|--------------|
|                                |       | Low             | High |              |
| <b>Gender</b>                  |       |                 |      |              |
| Male                           | 166   | 57              | 109  | 0.550        |
| Female                         | 30    | 12              | 18   |              |
| <b>Age</b>                     |       |                 |      |              |
| ≤ 50                           | 107   | 41              | 66   | 0.317        |
| > 50                           | 89    | 28              | 61   |              |
| <b>Preoperative AFP</b>        |       |                 |      |              |
| < 400 ng/ml                    | 107   | 43              | 64   | 0.109        |
| ≥400 ng/ml                     | 89    | 26              | 63   |              |
| <b>Preoperative ALT</b>        |       |                 |      |              |
| ≤ 40 U/L                       | 101   | 41              | 60   | 0.103        |
| > 40 U/L                       | 95    | 28              | 67   |              |
| <b>Preoperative AST</b>        |       |                 |      |              |
| ≤ 40 U/L                       | 116   | 47              | 69   | 0.061        |
| > 40 U/L                       | 80    | 22              | 58   |              |
| <b>Preoperative ALB</b>        |       |                 |      |              |
| < 35 g/L                       | 6     | 2               | 4    | 0.922        |
| ≥ 35 g/L                       | 190   | 67              | 123  |              |
| <b>HBsAg</b>                   |       |                 |      |              |
| Negative                       | 31    | 14              | 17   | 0.206        |
| Positive                       | 165   | 55              | 110  |              |
| <b>Tumor Stage</b>             |       |                 |      |              |
| I & II                         | 141   | 56              | 85   | <b>0.034</b> |
| III&IV                         | 55    | 13              | 42   |              |
| <b>Tumor Size</b>              |       |                 |      |              |

|                          |     |    |     |              |
|--------------------------|-----|----|-----|--------------|
| ≤ 5 cm                   | 75  | 22 | 53  | 0.175        |
| > 5 cm                   | 121 | 47 | 74  |              |
| <b>Multiple Tumor</b>    |     |    |     |              |
| No                       | 153 | 57 | 96  | 0.257        |
| Yes                      | 43  | 12 | 31  |              |
| <b>Tumor Embolus</b>     |     |    |     |              |
| No                       | 160 | 61 | 99  | 0.071        |
| Yes                      | 36  | 8  | 28  |              |
| <b>Adjacent Invasion</b> |     |    |     |              |
| No                       | 188 | 69 | 119 | <b>0.033</b> |
| Yes                      | 8   | 0  | 8   |              |
| <b>Tumor Relapse</b>     |     |    |     |              |
| No                       | 70  | 34 | 36  | <b>0.003</b> |
| Yes                      | 126 | 35 | 91  |              |
| <b>Differentiation</b>   |     |    |     |              |
| Well                     | 17  | 14 | 3   | <b>0.000</b> |
| Moderate                 | 98  | 46 | 52  |              |
| Poor                     | 81  | 9  | 72  |              |

\*: Two-sided  $\chi^2$  test.

**Supplementary Table 2** Univariate and multivariate Cox regression analysis of clinical pathological features associated with overall survival.

| Clinical Pathological Features | Univariate Analysis |              |              | Multivariate Analysis |              |                 |
|--------------------------------|---------------------|--------------|--------------|-----------------------|--------------|-----------------|
|                                | HR                  | 95% CI       | P value      | HR                    | 95% CI       | <i>P</i> *value |
| <b>Age (year)</b>              |                     |              |              |                       |              |                 |
| >50 vs. ≤50                    | 1.346               | 0.912-1.985  | 0.134        | NA                    | NA           | NA              |
| <b>Gender</b>                  |                     |              |              |                       |              |                 |
| Female vs. Male                | 0.617               | 0.382-0.998  | <b>0.049</b> | 0.648                 | 0.391-1.074  | 0.092           |
| <b>Tumor stage</b>             |                     |              |              |                       |              |                 |
| III/IV vs. I/II                | 4.059               | 2.716-6.067  | <b>0.000</b> | 1.970                 | 1.082-3.585  | <b>0.026</b>    |
| <b>HBV</b>                     |                     |              |              |                       |              |                 |
| HBV+ vs. HBV-                  | 1.054               | 0.609-1.824  | 0.851        | NA                    | NA           | NA              |
| <b>ALT (U/L)</b>               |                     |              |              |                       |              |                 |
| >40 vs. ≤40                    | 1.202               | 0.815-1.773  | 0.354        | NA                    | NA           | NA              |
| <b>AST (U/L)</b>               |                     |              |              |                       |              |                 |
| >40 vs. ≤40                    | 2.003               | 1.357-2.958  | <b>0.000</b> | 1.197                 | 0.795-1.803  | 0.389           |
| <b>AFP (ng/ml)</b>             |                     |              |              |                       |              |                 |
| ≥400 vs. <400                  | 1.690               | 1.145-2.495  | <b>0.008</b> | 1.094                 | 0.706-1.693  | 0.688           |
| <b>Multiple tumor</b>          |                     |              |              |                       |              |                 |
| + vs. -                        | 2.154               | 1.408-3.296  | <b>0.000</b> | 0.985                 | 0.553-1.755  | 0.959           |
| <b>Tumor embolus</b>           |                     |              |              |                       |              |                 |
| + vs. -                        | 2.132               | 1.364-3.333  | <b>0.001</b> | 1.140                 | 0.688-1.888  | 0.612           |
| <b>Tumor diameter (cm)</b>     |                     |              |              |                       |              |                 |
| >5 vs. ≤5                      | 2.030               | 1.318-3.126  | <b>0.001</b> | 1.112                 | 0.662-1.866  | 0.688           |
| <b>Tumor relapse</b>           |                     |              |              |                       |              |                 |
| Yes vs. No                     | 26.86               | 9.838-73.351 | <b>0.000</b> | 19.06                 | 6.805-53.433 | <b>0.000</b>    |
| <b>Tumor differentiation</b>   |                     |              |              |                       |              |                 |
| Poor vs. Well                  | 1.966               | 1.332-2.903  | <b>0.001</b> | 1.440                 | 0.920-2.253  | 0.110           |
| <b>GDF1 expression</b>         |                     |              |              |                       |              |                 |
| High vs. Low                   | 1.923               | 1.269-2.915  | <b>0.002</b> | 2.382                 | 1.399-4.055  | <b>0.001</b>    |

\*: Log-rank test.



**Supplementary Table 3** Clinical characteristics of the patients in HKU cohort, TCGA cohort.

|                            | HKU cohort | TCGA cohort |
|----------------------------|------------|-------------|
| No. of patients            | 83         | 373         |
| Gender, No. (%)            |            |             |
| Male                       | 69 (83.1%) | 252 (67.6%) |
| Female                     | 14 (16.9%) | 121 (32.4%) |
| Tumor Stage, No. (%)       |            |             |
| I                          | 36 (43.4%) | 172 (46.1%) |
| II                         | 2 (2.4%)   | 87 (23.3%)  |
| III                        | 20 (24.1%) | 85 (22.8%)  |
| IV                         | 0 (0%)     | 5 (1.3%)    |
| Tumor Grade, No. (%)       |            |             |
| G1                         | 10 (12.0%) | 55 (14.7%)  |
| G2                         | 41 (49.4%) | 178 (47.7%) |
| G3&4                       | 23 (27.7%) | 135 (36.2%) |
| Cirrhosis, No. (%)         |            |             |
| No                         | 25 (30.1%) | 134 (35.9%) |
| Yes                        | 53 (63.9%) | 80 (21.4%)  |
| Vascular invasion, No. (%) |            |             |
| No                         | 13 (15.7%) | 207 (55.5%) |
| Yes                        | 66 (79.5%) | 110 (29.5%) |
| Recurrence, No. (%)        |            |             |
| No                         | 46 (55.4%) | 237 (63.5%) |
| Yes                        | 35 (42.2%) | 136 (36.5%) |
| HBsAg , No. (%)            |            |             |
| No                         | 23 (27.7%) | 232 (62.2%) |
| Yes                        | 54 (65.1%) | 141 (37.8%) |
| HCVAb , No. (%)            |            |             |
| No                         | 76 (91.6%) | 288 (77.2%) |
| Yes                        | 1 (1.2%)   | 85 (22.8%)  |





**Supplementary Table 4** Sequences of primers used in qPCR.

| <b>Gene</b> | <b>Forward (5'-3')</b>    | <b>Reverse (5'-3')</b>  |
|-------------|---------------------------|-------------------------|
| 18S         | AACCCGTTGAACCCCAT         | CCATCCAATCGGTAGTAGCG    |
| GDF1        | GGGTCGCCGGAACATC          | CAGCCGACAGGTCGAAGACG    |
| AFP         | CTTTGGGCTGCTCGCTATGA      | GCATGTTGATTTAACAAGCTGCT |
| EPCAM       | AATCGTCAATGCCAGTGTACTT    | TCTCATCGCAGTCAGGATCATAA |
| KRT19       | AACGGCGAGCTAGAGGTGA       | GGATGGTCGTGTAGTAGTGGC   |
| KRT7        | TCCGCGAGGTCACCATTAAC      | GCTCTGTCAACTCCGTCTCAT   |
| SOX9        | AGCGAACGCACATCAAGAC       | CTGTAGGCGATCTGTTGGGG    |
| HNF4A       | CTGCCAATATCGCTACAAC       | CATCCCTACGCTCCAGTA      |
| ALB         | TTTATGCCCCGGAACCTCTTT     | AGTCTCTGTTTGGCAGACGAA   |
| TTR         | CATTTGCCTCTGGGAAAACCAG    | AATGGGGAGATGCCAAGTGC    |
| ARG1        | TGGACAGACTAGGAATTGGCA     | CCAGTCCGTCAACATCAAAACT  |
| ALDH        | AGTCATCCCCTCGCTATTCC      | GTCCCCTGAGGATTGCTTACA   |
| GAGE1       | GATAGCCAGGAACAGGGTCAC     | ACTGTGATTGCCCTTCACCTT   |
| GAGE2A      | GGGACAGGATGAGGGAGCA       | CCATCAGGACCATCTTCACACTC |
| GAGE2E      | GAGGAAGATCGACCTATCGGC     | GGTGACCCTGTTCTGGCTATC   |
| GAGE10      | CAGGAACAGGTTCAACCAAAG     | CACCTCCTCTGGATTTGGCA    |
| GAGE12E     | AAGGGGAACCAGCAACTCAAT     | GCAGATGCTCCCTCATCCTC    |
| GAGE12G     | GCCCGAGCAGTTCAGTGATG      | CCTGTTCTGGCTATGAGCTTC   |
| GAGE12J     | TATTGGCCTAGACCAAGACCCTA   | TGACCCTGTTCTGGCTATCA    |
| GAGE12H     | CTAGACCAAGGCGCTATGTACAG   | TCCCTCATCCTCTCCCTTCTG   |
| GAGE13      | TTATTGGCCTAGACCAAGACGCTAC | TGACCCTGTTCTGGCTATCA    |
| PAGE1       | CTATCGGCGTAGACCAA         | CTCTTCATTTTCGAGGCACA    |
| PAGE5       | GCTGGAACGAGGGAGGAAG       | TCAGTGGGCTGCTGGACAA     |
| LY6D        | TGAGGGGGAATCTGGTGAAG      | ACAGGCTGGGGGCTAAGAT     |
| LY6E        | TAGTGCCGGCATTGGGAATC      | CATCGGCCGCACTGAAATTG    |
| LY6K        | ACGGACGAGGGTGACAATAGAG    | GCTTCGCAACCATGAAAAAAC   |

|         |                           |                           |
|---------|---------------------------|---------------------------|
| LY6H    | CACCCTGACCACCAACTCCA      | AACGAAGTCACAGGAGGAGGC     |
| LY6G6D  | CAAGTGGAGACAGAGTCGGTGG    | AAGAGACAGGTCAGGGCGGTA     |
| MAGED1  | CCTGACGCTTGTAGAGCAGT      | GAGGCCTCAGCAGGAGC         |
| MAGED2  | GGTGCGGCTGCAGAGAATTG      | GCAAGAGCTGAGCCTTCCGTA     |
| MAGED4  | GCTGAGCTCTCATCTCCCTG      | GTTCCCAGGGCTCATTCGAT      |
| MAGED4B | CTTCTGCAGGAGAGGGCAAA      | TTCCAGGGTGTACGTTGCTC      |
| DNMT1   | GACCCACGAAAGCCACCA        | GACACACCTCACAGACGCCA      |
| DNMT3A  | CAGGATAGCCAAGTTCAGCAAA    | GTGGACTGGGAAACCAAATACC    |
| DNMT3B  | TAAGTCGAAGGTGCGTCGTG      | CGTCTTCGAGTCTTGTCTCGTA    |
| DNMT3L  | AGTCAAGGCTAACCAGCGAAAT    | CGCAGATCCCTCCCTCAAA       |
| HDAC1   | TTTGCTGCTCAACTATGGTCTCTAC | CGATGTCCGTCTGCTGCTTAT     |
| HDAC2   | GCTTGCCATCCTTGAATTACTAA   | ATTGACAGCATAGTATTTGCCTTTT |
| HDAC3   | TGCAAGGCTTCACCAAGAGTCT    | GGATGCCAATCACAATGTCGTT    |
| HDAC4   | AAAAGCGTCCGTTGGATGTC      | GGCAAGGATGGCGATGTCT       |
| HDAC5   | GCTGAGAATGGCTTTACTGGC     | AGTTGGTGACAGTGACCGTGG     |
| HDAC6   | TATTTCTCCATCCACCGCTACG    | ACCTGGTTCCAAGGCACATT      |
| HDAC7   | ATGACGCAGCAACTGATGAAC     | GCGGATGGCATTGAGGTT        |
| HDAC8   | GCAATTAAGTGGTCTGGAGGGT    | GGAGGTGAAACTGAATGCGTCT    |
| HDAC9   | TGAGACGCAGACGCTTAGGC      | CTGTCGCATTTGTTCTTTCAATAAT |
| HDAC10  | ACTTCCACCCGAGTACCTTTCA    | ACATCCCAGTCCACGACGAG      |
| CDK4    | CGTGAGGTGGCTTTACTGAGG     | CTTGTCAGATATGTCCTTAGGTCC  |
| CDK6    | CAGAAATGTTTCGTAGAAAGCCTCT | GGTCCTGGAAGTATGGGTGAGA    |
| CDK9    | CCAGAAGCGGAAGGTGAAG       | CCAGAAGAAGTCGTGGTTGAGG    |
| IDH1    | TCAGTGGCGGTTCTGTGGTAG     | CTTGGTGACTTGGTTCGTTGGT    |
| IDH2    | AGAACACCATACTGAAAGCCTACG  | CACACAAAGCCACCCGAAG       |
| LSD1    | TACCCGCTCCACGAGTCAA       | GGATCAGCACGCCAACGA        |
| SETDB1  | TCGGGTGGTCGCCAAATA        | GTGCCTTCCCCTCAGTCTTG      |
| DOT1L   | CCCCTCAACCTCAACTCCAT      | GCCAAGCCACCACCATTTT       |

|          |                       |                         |
|----------|-----------------------|-------------------------|
| EZH2     | GGACGGCTTCCCAATAACAG  | ATTGAGGCTTCAGCACCACT    |
| AICDA    | TCAAAAATGTCCGCTGGGC   | TTCCCTCGCAGAAAGTCGG     |
| CDA      | GAAGTCAGCCTACTGCCCTAC | AGCGGGTAGCAGGCATTTT     |
| m18S     | AGGGGAGAGCGGGTAAGAGA  | GGACAGGACTAGGCGGAACA    |
| mGDF1    | AACTAGGGGTCGCCGAAA    | TCAAAGACGACTGTCCACTCG   |
| mSOX2    | GCGGAGTGGAACCTTTTGTCC | CGGGAAGCGTGTACTTATCCTT  |
| mKRT19   | GGGGTTTCAGTACGCATTGG  | GAGGACGAGGTCACGAAGC     |
| mKRT7    | AGGAGATCAACCGACGCAC   | GTCTCGTGAAGGGTCTTGAGG   |
| mSOX9    | GAGCCGGATCTGAAGAGGGA  | GCTTGACGTGTGGCTTGTTT    |
| mAFP     | CTTCCCTCATCCTCCTGCTAC | ACAAACTGGGTAAAGGTGATGG  |
| mALB     | TGCTTTTTCCAGGGGTGTGTT | TTACTTCCTGCACTAATTTGGCA |
| chipLSD1 | TGCCAGGTCCCACTCCAAAC  | ACAAAAAGGGTCGGAGACACC   |

**Supplementary Table 5** Target sequences of shRNA and gRNA.

| Name          | Target sequence          |
|---------------|--------------------------|
| mGDF1 gRNA-1  | CGTCTTTGACCTGTCGAATG-TGG |
| mGDF1 gRNA-2  | CCTGCGACACTACGAAGACA-TGG |
| GDF1 gRNA-1   | TGTGGCGCCTGTTTCGACGC-CGG |
| GDF1 gRNA-2   | CATCGCGCAGTCCTAGAGCC-TGG |
| ALK4-RNAi #1  | CTGCTGCTACACTGACTACTG    |
| ALK4-RNAi #2  | AGCAGAGATATAACCAGACGGT   |
| ALK5-RNAi #1  | GCGAGAACTATTGTGTTACAA    |
| ALK5-RNAi #2  | GCCTTGAGAGTAATGGCTAAA    |
| ALK7-RNAi #1  | CGGAGGAATTGTTGAGGAGTA    |
| ALK7-RNAi #2  | GCAACACCTCAACTCATCTTT    |
| SMAD2-RNAi #1 | CAGCAGAACTATCTCCTACTA    |
| SMAD2-RNAi #2 | AACCAGGAATTTGCTGCTCTT    |
| SMAD3-RNAi #1 | GCAACCTGAAGATCTTCAACA    |
| SMAD3-RNAi #2 | GCTTTGAGGCTGTCTACCAGT    |
