# Supplementary material for: Growth differentiation factor 1-induced tumour plasticity provides a therapeutic window for immunotherapy in hepatocellular carcinoma
Source: PubMed Central journal article supplement (PMC8654996; doi:10.1038/s41467-021-27525-9), 2021-12-08
Supplement: 41467_2021_27525_MOESM3_ESM.pdf [file 41467_2021_27525_MOESM3_ESM.pdf]

**Title:** Supplementary Data 1:

**Description:** Gene list and expression in PCR array.

**Title:** Supplementary Data 2:

**Description:** Differentially expressed genes in RNA-seq data of PLC-8024-CTR and PLC-8024-GDF1 cells.

**Title:** Supplementary Data 3:

**Description:** List of CTA genes.
